# Supplementary material for: A comparative study of Bacterial culture isolates, site of infections and drug resistance pattern between COVID and non COVID patients admitted in a tertiary care hospital: A Pilot study
Source: bioRxiv or medRxiv preprint supplement (doi:10.1101/2021.09.12.21263386), 2021-09-15
Supplement: Supplementary file [file media-1.pdf]

To  
Dr Arup Halder MD (TB & RESPIRATORY MEDICINE), DCH  
CONSULTANT PULMONOLOGIST  
WOODLANDS HOSPITAL

**SUBJECT: IEC APPROVAL LETTER**  
**(IEC REGD NO: ECR/J66/Inst/Woodlands/2013/RR-20)**

A meeting of Institutional Ethics Committee of WOODLANDS MULTISPECIALITY HOSPITAL on 21.06.2021 virtually from 17.30- 19.30pm. In this meeting a research proposal title "*A comparative study of Bacterial culture isolates, site of infection, antibiogram between COVID and non COVID patients admitted in a tertiary care hospital: Descriptive and retrospective data of a year*" of which you are the principal investigator and Dr D.N.Mukherjee<sup>2</sup>, Dr Soumyadeep Seal<sup>3</sup>, Dr Hindol Dasgupta<sup>4</sup> Dr Mainak Chakraborty<sup>5</sup>, Department of Clinical Microbiology, Department of Pulmonology Woodlands Multispecialty Hospital are co-investigators were reviewed.

The following additional documents submitted by you were also reviewed:

1. Study synopsis
2. Proforma for data analysis.

After deliberation and review the committee thinks the study be done in two portions; first including pilot group so as to corroborate data findings and statistical analysis more suitable. Also as retrospective patient antibiogram data belongs to hospital management, a due NOC / Allowance letter would be necessary from the Hospital management appropriate authority to initiate the study trial. NOC from the hospital management has been received and hence the committee has **APPROVED** the study to be initiated.

The list of committee members present are appended herewith:

|                      |                                                                    |
|----------------------|--------------------------------------------------------------------|
| Dr (Prof) S K Basu   | Chairman                                                           |
| Dr. Malati Purkait   | Vice Chairman                                                      |
| Dr. Soumyadeep Seal. | Member Secretary<br>(Absent during discussion pertaining to study) |
| Dr. Anjan Adhikari   | Basic medical Scientist                                            |
| Dr. Udayan Bakshi    | Clinician                                                          |
| Mr. Prabir Mitra,    | Legal Expert                                                       |
| Dr. Pushpita Mandal, | Clinician                                                          |
| Mrs Sudha Kaul,      | Social Scientist                                                   |
| Dr Reena Sen         | Member                                                             |
| Mrs Sunita Sarkar    | Lay Person                                                         |

The committee expects that any amendments to the study protocol or any other relevant documents would be brought to notice,

Date: 01.07.2021

Place: Kolkata.



Dr (Prof) S K Basu  
Chairman  
Institutional Ethics Committee  
Woodlands Multispecialty Hospital  
8/5 Alipore Road  
Kolkata 700027



Dr Malati Purkait  
Vice Chairman  
Institutional Ethics Committee  
Woodlands Multispecialty Hospital  
8/5 Alipore Road  
Kolkata 700027
